# Supplementary material for: Hexagonal AgBr crystal plates for efficient photocatalysis through two methods of degradation: methyl orange oxidation and CrVI reduction
Source: Royal Society of Chemistry journal article supplement (doi:10.1039/c7ra02354e), 2017-01-01
Supplement: c7ra02354e1.pdf [file c7ra02354e1.pdf]

## Hexagonal AgBr Crystal Plate for Efficient Photocatalysis through Two Degradation Manners: Methyl Orange Oxidation and Cr<sup>VI</sup> Reduction

Hui Zheng,<sup>a,b</sup> Peng Li,<sup>b</sup> Lisheng Gao,<sup>b</sup> Guangming Li<sup>a\*</sup>

<sup>a</sup> Key Laboratory of Functional Inorganic Material Chemistry (MOE), School of Chemistry and Materials Science, Heilongjiang University, No. 74, Xuefu Road, Nangang District, Harbin, Heilongjiang 150080, P. R. China.

E-mail: gml\_i\_2000@163.com; Tel: +86-451-86608458

<sup>b</sup> Institute of Forensic Science, Ministry of Public Security, Beijing 100038, China. NO.17 Muxidi Nanli, Beijing, China 100038.

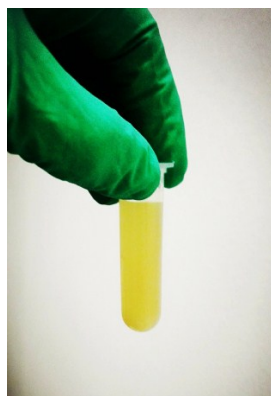

Figure S1. Yellow colored product solution.

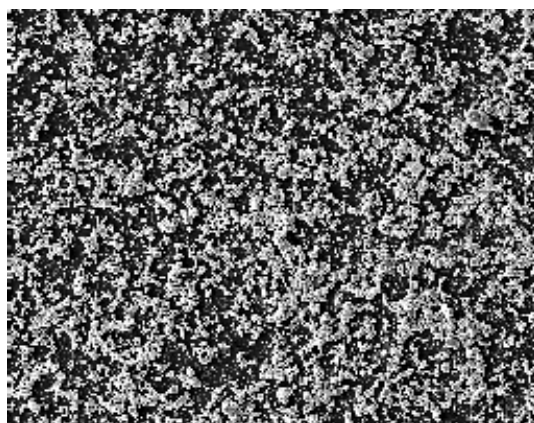

Figure S2. High-angle dark-field scanning transmission electron microscopy.

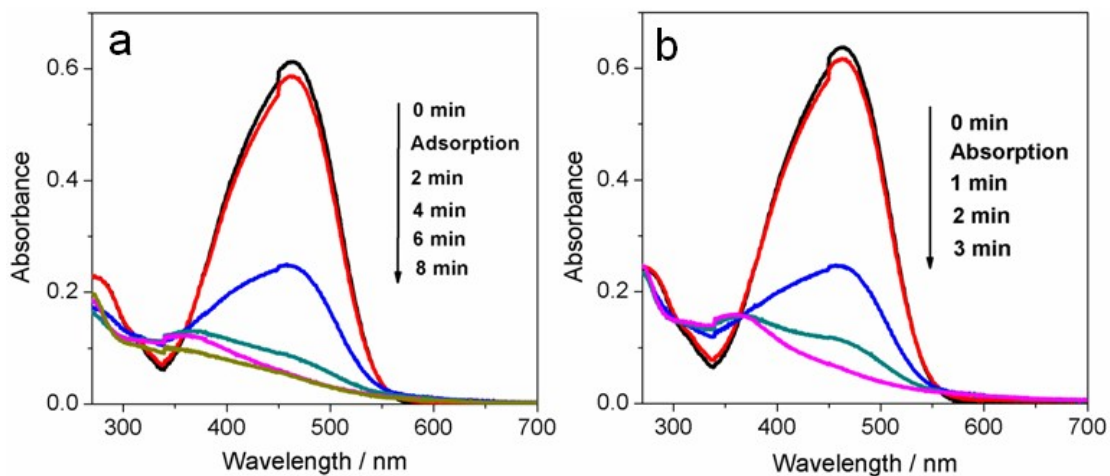

Figure S3. MO degradation of the AgBr-hexagonal crystal plate under visible light ( $> 400$  nm) and simulate solar light (AM 1.5).

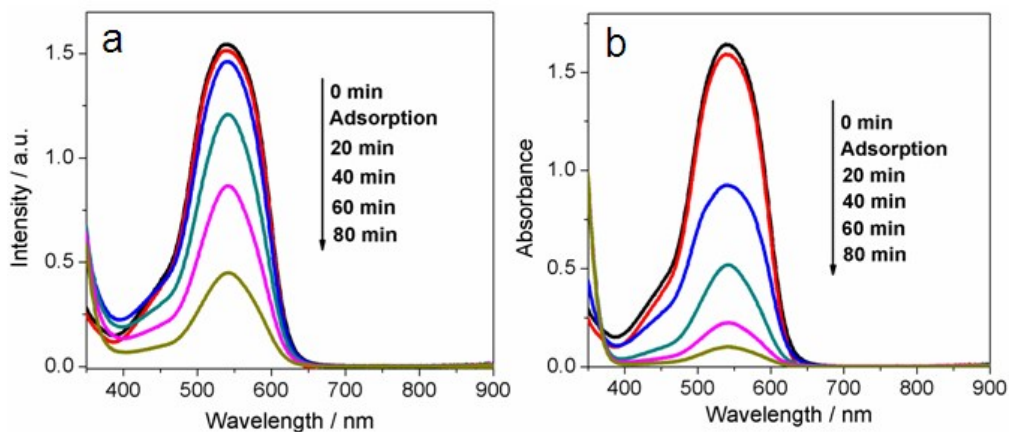

Figure S4. Cr (IV) reduction of the AgBr-hexagonal crystal plate under visible light ( $> 400$  nm)

and simulate solar light (AM 1.5).

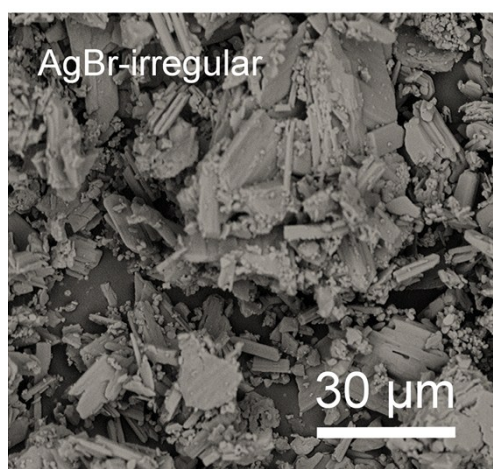

Figure S5. SEM image of AgBr-irregular crystal with scale bar 30  $\mu\text{m}$ .

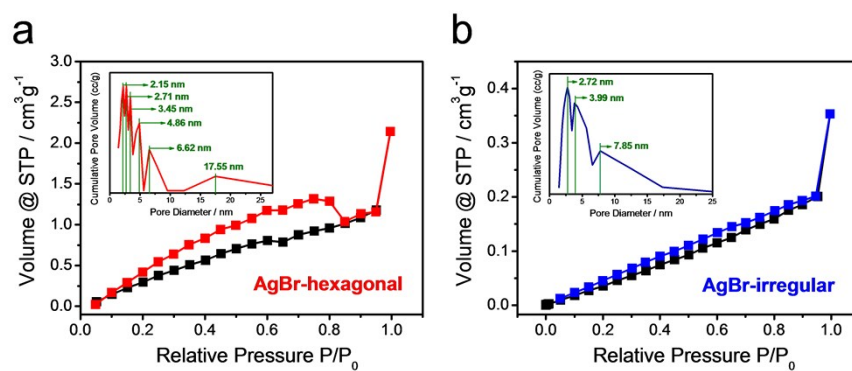

Figure S6. Nitrogen sorption isotherm of AgBr-hexagonal (a) and AgBr-irregular (b) with the corresponding pore diameter distribution (inset).
